# Supplementary material for: Suitability of GRK Antibodies for Individual Detection and Quantification of GRK Isoforms in Western Blots
Source: MDPI journal article supplement (doi:10.3390/ijms23031195), 2022-01-21
Supplement: s1 [file s1]

Supplementary Figure S1

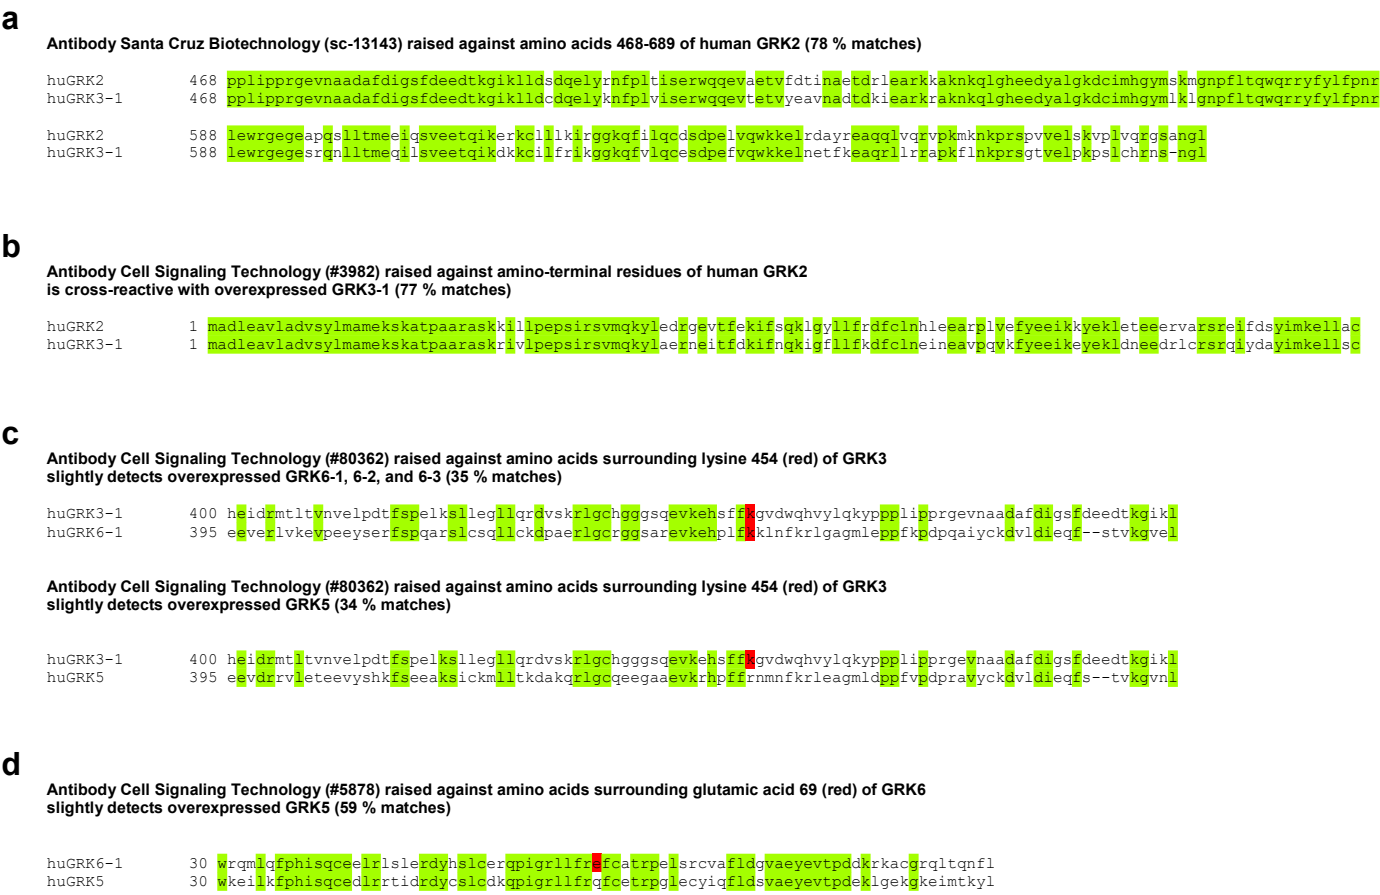

**Supplementary Figure S1:** Alignment of protein sequences used to create designated antibodies and the corresponding sequence of the indicated GRK isoform which are also detected by the antibody. Amino acids identical in both sequences are highlighted in green. Total identity is denoted in per cent. **a** Alignment of human GRK2 and human GRK3-1 protein sequences from amino acid 468 to 689 which are both recognized by antibody sc-13143 (Santa Cruz Biotechnology). **b** Alignment of human GRK2 and human GRK3-1 protein sequences from the first amino acid to amino acid 120 which are both recognized by antibody CS #3982 (Cell Signaling Technology). **c** Alignment of human GRK3-1 with human GRK6-1 and GRK5 protein sequences from amino acid 400 to 499 and 395 to 494, respectively. Antibody CS #80362 (Cell Signaling Technology) was raised against GRK3 but also detects GRK6-1, -2, -3 and GRK5. **d** Alignment of human GRK6-1 and human GRK5 protein sequences from amino acid 30 to 499 which are both recognized by antibody CS #5878 (Cell Signaling Technology).

## Supplementary Figure S2

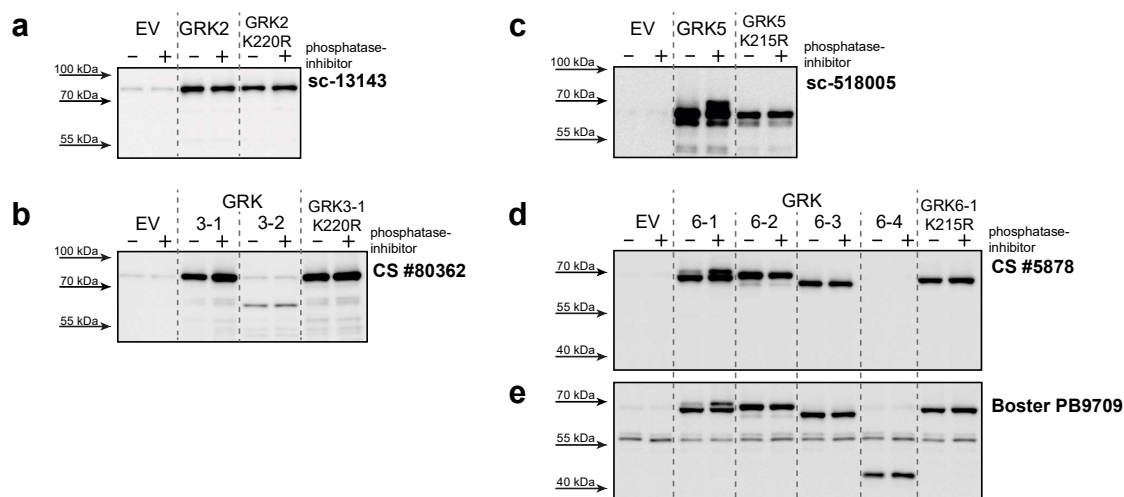

### Supplementary Figure S2:

HEK293 cells were transfected with either empty vector (EV), GRK2 (**a**), 3 (**b**), 5 (**c**), and 6 isoforms (**d**) or their corresponding kinase-dead variants GRK2-K220R (**a**), GRK3-1-K220R (**b**), GRK5-K215R (**c**), and GRK6-1-K215R (**d**). Lysates were prepared in presence (+) or absence (-) of phosphatase inhibitors and EDTA. Western blot analysis of the lysates using the indicated antibodies was performed.

Supplementary Figure S3

GRK2

**a** Antibody Santa Cruz Biotechnology (sc-13143) raised against amino acids 468-689 of human GRK2

|            |     |                                                                                                                          |                         |
|------------|-----|--------------------------------------------------------------------------------------------------------------------------|-------------------------|
| huGRK2     | 468 | pplipprgeevnaadafdigsfdeedtkgikllsdsgelyrnfpltiserwqgevaetvfdtinaetdrlearkkaknkqlgheedyalgkdcimhgyskmgnpfltqwqrryfyfnpnr |                         |
| muGRK2-1   | 468 | pplipprgeevnaadafdigsfdeedtkgikllsdsgelyrnfpltiserwqgevaetvfdtinaetdrlearkkaknkqlgheedyalgkdcivhgyskmgnpfltqwqrryfyfnpnr |                         |
| ratGRK2    | 468 | pplipprgeevnaadafdigsfdeedtkgikllsdsgelyrnfpltiserwqgevaetvfdtinaetdrlearkkaknkqlgheedyalgkdcimhgyskmgnpfltqwqrryfyfnpnr |                         |
| hamGRK2-x2 | 468 | pplipprgeevnaadafdigsfdeedtkgikllsdsgelyrnfpltiserwqgevaetvfdtinaetdrlearkkaknkqlgheedyalgkdcimhgyskmgnpfltqwqrryfyfnpnr |                         |
| monGRK2    | 468 | pplipprgeevnaadafdigsfdeedtkgikllsdsgelyrnfpltiserwqgevaetvfdtinaetdrlearkkaknkqlgheedyalgkdcimhgyskmgnpfltqwqrryfyfnpnr |                         |
|            |     |                                                                                                                          |                         |
| huGRK2     | 588 | lewrgegeapqsltmeeiqsveetqikerkc1llkirgkqfvlqcdsdpe1vgwkkelrdayreaqqlvqrvpkmknkprspvvelskvplvqrgsangl                     | 98 % identity to huGRK2 |
| muGRK2-1   | 588 | lewrgegeapqsltmeeiqsveetqikerkc1llkirgkqfvlqcdsdpe1vgwkkelrdayreaqqlvqrvpkmknkprspvvelskvplvqrgsangl                     | 98 % identity to huGRK2 |
| ratGRK2    | 588 | lewrgegeapqsltmeeiqsveetqikerkc1llkirgkqfvlqcdsdpe1vgwkkelrdayreaqqlvqrvpkmknkprspvvelskvplvqrgsangl                     | 99 % identity to huGRK2 |
| hamGRK2-x2 | 588 | lewrgegeapqsltmeeiqsveetqikerkc1llkirgkqfvlqcdsdpe1vgwkkelrdayreaqqlvqrvpkmknkprspvvelskvplvqrgsangl                     | 99 % identity to huGRK2 |
| monGRK2    | 588 | lewrgegeapqsltmeeiqsveetqikerkc1llkirgkqfvlqcdsdpe1vgwkkelrdayreaqqlvqrvpkmknkprspvvelskvplvqrgsangl                     | 99 % identity to huGRK2 |

**b** Antibody Cell Signaling Technology (#3982) raised against amino-terminal residues of human GRK2

|            |   |                                                                                                                       |       |
|------------|---|-----------------------------------------------------------------------------------------------------------------------|-------|
| huGRK2     | 1 | madleavladvsylmamekskatpaaraskkillpepsirsvmqyledrgvtfekifsqklgyllfrdfc1nhleearplvefyeeikkyekleteeervrsreifdsyimkellac |       |
| muGRK2-1   | 1 | madleavladvsylmamekskatpaaraskkillpepsirsvmqyledrgvtfekifsqklgyllfrdfc1nhleearplvefyeeikkyekleteeervrsreifdsyimkellac | 98 %  |
| ratGRK2    | 1 | madleavladvsylmamekskatpaaraskkillpepsirsvmqyledrgvtfekifsqklgyllfrdfc1nhleearplvefyeeikkyekleteeervrsreifdsyimkellac | 96 %  |
| hamGRK2-x2 | 1 | madleavladvsylmamekskatpaaraskkillpepsirsvmqyledrgvtfekifsqklgyllfrdfc1nhleearplvefyeeikkyekleteeervrsreifdsyimkellac | 97 %  |
| monGRK2    | 1 | madleavladvsylmamekskatpaaraskkillpepsirsvmqyledrgvtfekifsqklgyllfrdfc1nhleearplvefyeeikkyekleteeervrsreifdsyimkellac | 100 % |

**Supplementary Figure S3:** Alignment of human, mouse, rat, hamster, and monkey GRK2 protein sequences from amino acid 468 to 689 **(a)** and 1 to 120 **(b)**. Differing amino acids are highlighted in yellow. Total identity is denoted in per cent.

# Supplementary Figure S4

## GRK3

Antibody Cell Signaling Technology (#80362) raised against amino acids surrounding lysine 454 (red)

|            |     |                                                        |          |                 |         |                     |           |
|------------|-----|--------------------------------------------------------|----------|-----------------|---------|---------------------|-----------|
| huGRK3-1   | 400 | heidrmtltvnvelpdtfspelksllegllqrdvskrlgchgggsqevkehsff | gvdwqhvy | lqkypplipprgevn | aa      | afdigsfdeedtkgiklld |           |
| muGRK3-1   | 400 | heidrmtltvnvlpd                                        | fspel    | sllegllqrdvs    | rlgcggg | arelkehiff          | gldwqhvy  |
| ratGRK3    | 400 | heidrmtltvnvlpd                                        | fspel    | sllegllqrdvs    | rlgcggg | arelkehiff          | gldwqhvy  |
| hamGRK3-x3 | 400 | heidrmtltvnvlpd                                        | fspel    | sllegll         | rdvs    | rlgcggg             | qevkehsff |
| monGRK3-x1 | 400 | heidrmtltvnvelpdtfspelksllegllqrdvskrlgchgggsqevkehsff | gvdwqhvy | lqkypplipprgevn | aa      | afdigsfdeedtkgiklld |           |

**Supplementary Figure S4:** Alignment of human, mouse, rat, hamster, and monkey GRK3 protein sequences from amino acid 400 to 100. Differing amino acids are highlighted in yellow. Total identity is denoted in per cent.

# Supplementary Figure S5

## GRK5

Antibody Santa Cruz Biotechnology (sc-518005) raised against amino acids 94-157 of human GRK5

|           |    |                                                                   |      |
|-----------|----|-------------------------------------------------------------------|------|
| huGRK5    | 94 | pdeklgekgkeimtkyltpkspvfiaqvggdlvsqteekllqkpkelfsacagsvheylrgep   |      |
| muGRK5    | 94 | pdehlgaakgkeimtkyltpkspvfiaqvggdlvsqteekllqspckelfsacagsvhdylkgdp | 89 % |
| ratGRK5   | 94 | pdehlgaakgkeimtkylspkspvfiaqvggdlvsqteekllqspckelfsacagsvhdylkgdp | 87 % |
| hamGRK5-3 | 94 | pdehlgekgkeiitkyltpkspvfiaqvggdlvsqteakllqkpkelfsacagsvhdylkgdp   | 89 % |
| monGRK5   | 94 | pdeklgekgkeimtkyltpkspvfiaqvggdlvssteekllqkpkelfsacagsvheylrgep   | 95 % |

**Supplementary Figure S5:** Alignment of human, mouse, rat, hamster, and monkey GRK5 protein sequences from amino acid 94 to 157. Differing amino acids are highlighted in yellow. Total identity is denoted in per cent.

# Supplementary Figure S6

## GRK6

**a** Antibody Cell Signaling Technology (#5878) raised against amino acids surrounding glutamic acid 69 (red) for GRK6

|            |    |                                           |                                         |      |
|------------|----|-------------------------------------------|-----------------------------------------|------|
| huGRK6-1   | 30 | wrqmlqfphisqceelrlslerdyhslcerqpigrllfrfc | atrpelsrcvafldgvaeyevtpddkrkacgrqltgnfl |      |
| muGRK6-3   | 30 | wrqmlqfphisqceelrlslerdyhslcerqpigrllfrfc | atrpeltrctafldgvseyevtpdekrkacgrlmgnfl  | 92 % |
| ratGRK6-3  | 30 | wrqmlqfphisqceelrlslerdyhslcerqpigrllfrfc | atrpeltrctafldgvaeyevtpdekrkacgrlmgnfl  | 93 % |
| hamGRK6-x1 | 30 | wrqmlqfphisqceelrlslerdyhslcerqpigrllfrfc | atrpeltrctafldgvaeyevtpdekrkacgrlmgnfl  | 93 % |
| monGRK6-x1 | 30 | wrqmlqfphisqceelrlslerdyhslcerqpigrllfrfc | atrpelsrcvafldgvaeyevtpdekrkacgrlmgnfl  | 96 % |

**b** Antibody Boster Biological Technology (PB9709) raised against amino acids 382-417 of human GRK6

|            |     |                                       |       |
|------------|-----|---------------------------------------|-------|
| huGRK6-1   | 382 | qspfqqrkkkkikreeverlvkevpeeyserfspqar |       |
| muGRK6-3   | 382 | qspfqqrkkkkikreeverlvkevpeeytdrfsqar  | 88 %  |
| ratGRK6-3  | 382 | qspfqqrkkkkikreeverlvkevpeeytdrfsqar  | 91 %  |
| hamGRK6-x1 | 382 | qspfqqrkkkkikreeverlvkevpeeysehfspqar | 97 %  |
| monGRK6-x1 | 382 | qspfqqrkkkkikreeverlvkevpeeyserfspqar | 100 % |

**Supplementary Figure S6:** Alignment of human, mouse, rat, hamster, and monkey GRK6 protein sequences from amino acid 30 to 110 **(a)** and 382 to 417 **(b)**. Differing amino acids are highlighted in yellow. Total identity is denoted in per cent.

Supplementary Table S1

Last edited on 19th of October 2021  
Overview of mRNA and protein accession identifiers of GRK isoforms in different mammals retrieved from <https://www.ncbi.nlm.nih.gov>. In case of human, mouse, and rat, the computationally predicted sequences reported are not shown. In case of hamster and monkey, all sequences shown are computationally predicted. Of note, some proteins within one species and GRK isoform are identical despite different accession numbers.

| human (homo sapiens) |                |                   | mouse (mus musculus) |                |                   | rat (rattus norvegicus) |                |                   | hamster (cricetus griseus) |                |                   | monkey (chlorocebus sabaeus) |                |                   |                |                |                |     |
|----------------------|----------------|-------------------|----------------------|----------------|-------------------|-------------------------|----------------|-------------------|----------------------------|----------------|-------------------|------------------------------|----------------|-------------------|----------------|----------------|----------------|-----|
|                      | mRNA accession | protein accession | # AA                 | mRNA accession | protein accession | # AA                    | mRNA accession | protein accession | # AA                       | mRNA accession | protein accession | # AA                         | mRNA accession | protein accession | # AA           |                |                |     |
| huGRK2               | NM_001619.5    | NP_001610.2       | 689                  | muGRK2-1       | NM_001290818.1    | NP_001277747.1          | 689            | ratGRK2           | NM_0127780.2               | NP_036908.2    | 689               | hamGRK2-x1                   | XM_02740884.2  | XP_027264485.1    | 699            |                |                |     |
|                      |                |                   |                      | muGRK2-2       | NM_130863.2       | NP_570933.1             | 647            |                   |                            |                |                   |                              | XM_007650600.4 | XP_007648790.2    | 699            |                |                |     |
|                      |                |                   |                      |                |                   |                         |                |                   |                            |                |                   |                              | XM_027408885.2 | XP_027264486.1    | 689            |                |                |     |
|                      |                |                   |                      |                |                   |                         |                |                   |                            |                |                   |                              | XM_003500943.5 | XP_003500991.1    | 689            |                |                |     |
|                      |                |                   |                      |                |                   |                         |                |                   |                            |                |                   | hamGRK2-x2                   |                |                   |                |                |                |     |
| huGRK3-1             | NM_005160.4    | NP_005151.2       | 688                  | muGRK3-1       | NM_177078.4       | NP_796052.2             | 688            | ratGRK3           | NM_012897.3                | NP_037029.2    | 688               | hamGRK3-x1                   | XM_007647887.3 | XP_007646077.1    | 401            |                |                |     |
|                      | huGRK3-2       | NM_001362778.2    | NP_001349707.1       |                | 575               | hamGRK3-x2              | XM_007647223.3 |                   | XP_007645413.3             | 245            |                   |                              |                |                   |                |                |                |     |
|                      |                |                   |                      | muGRK3-3       | NM_001285806.1    | NP_001272735.1          | 581            |                   |                            |                |                   | hamGRK3-x3                   | XM_027415948.2 | XP_027271749.1    | 688            |                |                |     |
| huGRK5               | NM_005308.3    | NP_005299.1       | 590                  | muGRK5         | NM_018869.3       | NP_061357.3             | 590            | ratGRK5           | NM_030829.2                | NP_110456.2    | 590               | hamGRK5-x1                   | XM_035436880.1 | XP_035292771.1    | 601            |                |                |     |
|                      |                |                   |                      |                |                   |                         |                |                   |                            |                |                   |                              | hamGRK5-x2     | XM_035441693.1    | XP_035297584.1 | 601            |                |     |
|                      |                |                   |                      |                |                   |                         |                |                   |                            |                |                   |                              | hamGRK5-x3     | XM_027406842.2    | XP_027262643.1 | 590            |                |     |
|                      |                |                   |                      |                |                   |                         |                |                   |                            |                |                   |                              | hamGRK5-x4     | XM_035441694.1    | XP_035297585.1 | 569            |                |     |
|                      |                |                   |                      |                |                   |                         |                |                   |                            |                |                   | hamGRK5-x5                   | XM_027406846.2 | XP_027262647.1    | 426            |                |                |     |
| huGRK6-1             | NM_001004106.3 | NP_001004106.1    | 576                  | muGRK6-1       | NM_001038018.5    | NP_001033107.1          | 589            | ratGRK6-1         | NM_031657.4                | NP_113845.2    | 589               | hamGRK6-x1                   | XM_007623236.4 | XP_007621426.2    | 576            |                |                |     |
|                      | huGRK6-2       | NM_002082.4       | NP_002073.2          |                | 589               | muGRK6-2                | NM_011938.5    |                   | NP_036068.2                | 560            | ratGRK6-2         | NM_001112713.1               | NP_00106184.1  | 560               | hamGRK6-x2     | XM_007623241.4 | XP_007621431.2 | 581 |
|                      | huGRK6-3       | NM_001004105.3    | NP_001004105.1       |                | 560               | muGRK6-3                | NM_001106182.1 |                   | NP_00106182.1              | 576            | ratGRK6-3         | NM_001112712.2               | NP_00106183.1  | 576               | hamGRK6-x3     | XM_007623249.4 | XP_007621439.2 | 481 |
|                      | huGRK6-4       | NM_001364164.2    | NP_001351093.1       |                | 366               | muGRK6-4                | NM_001286063.2 |                   | NP_001272992.1             | 557            |                   |                              |                | hamGRK6-x4        | XM_027409791.2 | XP_027265592.1 | 576            |     |
|                      |                |                   |                      | muGRK6-5       | NM_001286064.2    | NP_001272993.1          | 584            |                   |                            |                | hamGRK6-x5        | XM_027409792.2               | XP_027265593.1 | 560               |                |                |                |     |
|                      |                |                   |                      | muGRK6-6       | NM_001286065.1    | NP_001272994.1          | 542            |                   |                            |                | hamGRK6-x6        | XM_027409793.2               | XP_027265594.1 | 484               |                |                |                |     |
|                      |                |                   |                      | muGRK6-7       | NM_001286066.2    | NP_001272995.1          | 295            |                   |                            |                | hamGRK6-x7        | XM_027409794.2               | XP_027265595.1 | 481               |                |                |                |     |
|                      |                |                   |                      | muGRK6-8       | NM_001377076.1    | NP_001364005.1          | 571            |                   |                            |                | hamGRK6-x8        | XM_027409795.2               | XP_027265596.1 | 324               |                |                |                |     |
|                      |                |                   |                      | muGRK6-9       | NM_001377077.1    | NP_001364006.1          | 311            |                   |                            |                |                   |                              |                |                   |                |                |                |     |
